# Supplementary material for: Synthesis of Ni/Co/Al-layered triple hydroxide@brominated graphene hybrid on nickel foam as electrode material for high-performance supercapacitors
Source: Royal Society of Chemistry journal article supplement (doi:10.1039/c7ra08744f), 2017-01-01
Supplement: c7ra08744f1.pdf [file c7ra08744f1.pdf]

---

## Supporting Information

### **Synthesis of Ni/Co/Al-Layered Triple Hydroxide@Brominated Graphene hybrid on Nickel Foam as electrode material for High-Performance Supercapacitor**

Maher Jabeen, Muhammad Ishaq, Weiming Song\*, Liyang Xu and Qigang Deng\*

*a. College of Chemistry and Chemical Engineering, Qiqihar University, Qiqihar Heilongjiang 161006, P.R China.*

*b. School of Management Herbin Institute of Technology. Herbin 150001, Heilongjiang province P.R China*

***Note: The first two authors contributed equally.***

\*For correspondence: **Prof. Dr. Weiming Song**, 42, Wenhua street, College of Chemistry and Chemical Engineering, Qiqihar University, Qiqihar Heilongjiang 161006, R.P. China.

**Tel:** +8604522742594 **Email:** qdsongweiming@163.com

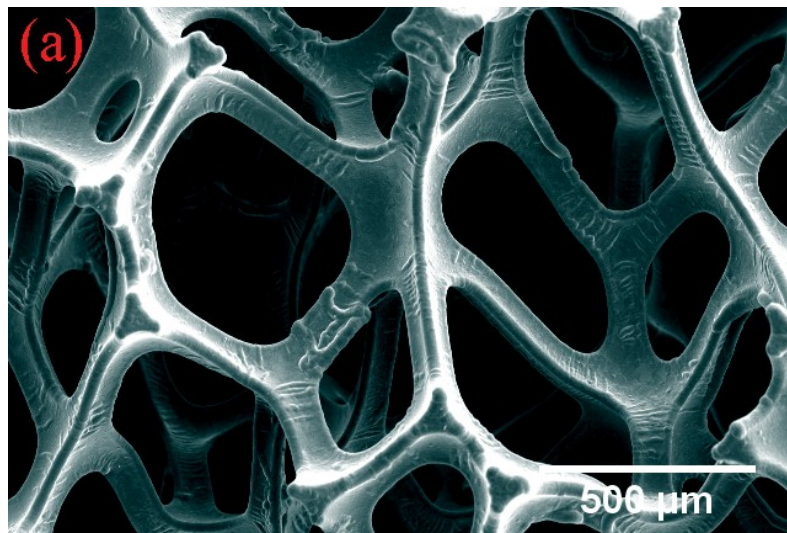

Figure S1. (a) SEM image of bare NF.

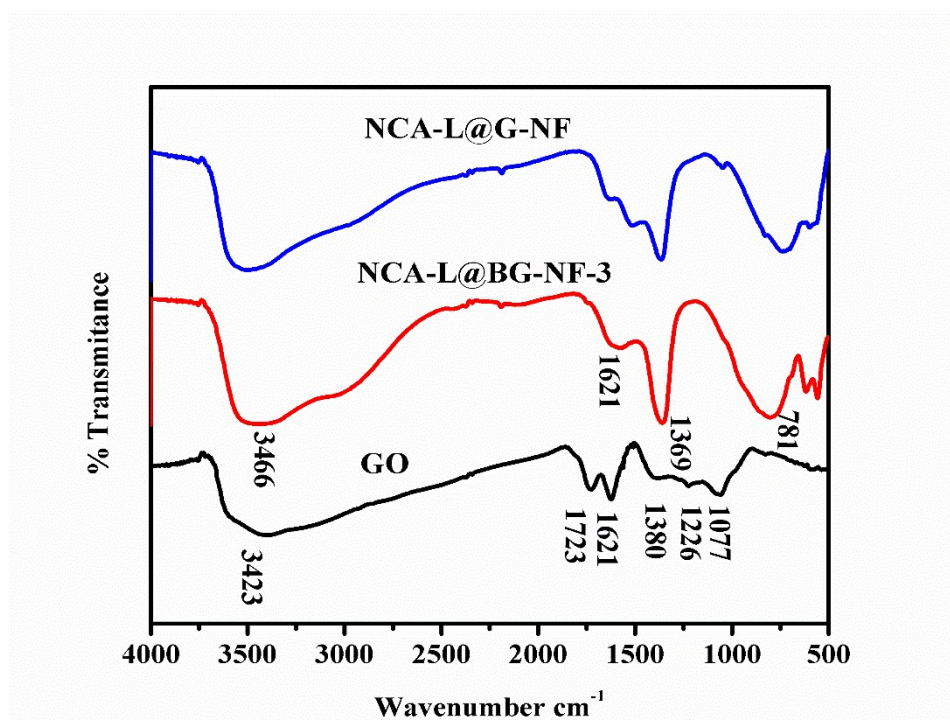

Figure S2. FTIR spectrum of GO, BG, NCA-L

---

As shown in Figure S2. For GO, the absorption around  $1723\text{ cm}^{-1}$  is assigned to C=O stretching vibration of COOH groups, and the absorption around  $1621\text{ cm}^{-1}$  is assigned to the stretching vibration of carbon backbone (C=C/C-C). Three absorption peaks around  $1036$ ,  $1226$  and  $1398\text{ cm}^{-1}$  are interpreted as alkoxy (C-O), epoxy (C-O-C), and carboxyl (C-OH) stretching vibrations, respectively. Moreover, there is strong and broad absorption bands between  $3423\text{ cm}^{-1}$  associated with hydroxyl group. The reduction of GO to BG only presents absorption peaks at  $1621\text{ cm}^{-1}$  and a small absorption peak of alkoxy groups at  $1036\text{ cm}^{-1}$ . However, as for NCA@BG-NF, the above characteristic absorption bands related to C=O and C-O stretching vibrations disappear because during hydrothermal reaction LTH is formed at the same time GO is reduced to BG and hybridized with LTH. In addition there are two intense peaks at around  $781$  and  $1369\text{ cm}^{-1}$  indicative of the existence of  $\text{CO}_3^{2-}$  anions of LTH.<sup>1,2</sup>

**Table S1.** XPS quantitative elemental composition analysis of prepared samples (At. %)

| Samples       | C1s   | O1s   | Ni2p  | Co2p | Al2p | Br3d |
|---------------|-------|-------|-------|------|------|------|
| NCA-L@G-NF    | 20.25 | 59.72 | 13.04 | 1.1  | 5.89 | -    |
| NCA-L@BG-NF-1 | 16.85 | 56.44 | 8.37  | 8.8  | 7.47 | 2.07 |
| NCA-L@BG-NF-2 | 19.59 | 55.66 | 16.04 | 3.49 | 3.09 | 2.13 |
| NCA-L@BG-NF-3 | 19.34 | 59.21 | 11.82 | 1.43 | 6    | 2.2  |

### High resolution XPS spectrums Ni2p, Co2p, Al2p, Br3d in NCA-L@BG-NF-3

As shown in figure S3a, b high resolution Ni 2p spectrum displayed two distinct peaks at 857.4 eV and 874.9 which correspond to Ni 2p<sub>3/2</sub> and Ni 2p<sub>1/2</sub>, signals of Ni<sup>2+</sup> with a spin-energy separation of 17.5 eV, are assigned to Ni<sup>2+</sup> state in Ni(OH)<sub>2</sub>. On the other hand The peaks at and 782.6 eV and 798.4 eV corresponds to Co 2p<sub>3/2</sub> and Co 2p<sub>1/2</sub>, respectively, indicating the Co<sup>+2</sup> oxidation state and the spin orbit splitting energy value is almost 15.8eV in NCA-L@BG-NF-3.<sup>3</sup> As shown in figure S3c the peak corresponding to Al 2p at 74.1 eV confirming the presence of Al in NCA-L.<sup>4</sup> As shown in figure S3 d. In addition, the prominent Br 3d peak at 68.5 eV is assigned to ionic Br<sup>-</sup>.<sup>5</sup>

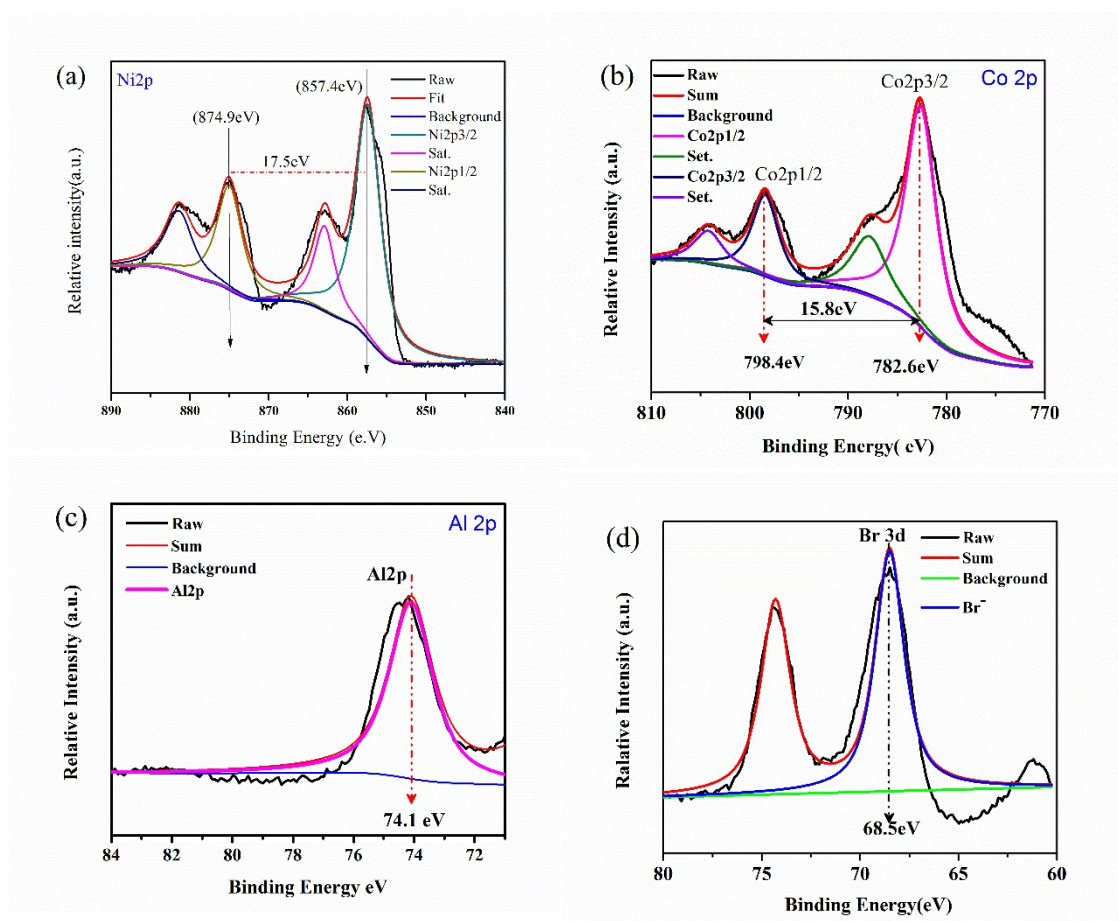

**Figure S3.** High resolution XPS spectrum (a) Ni2p, (b) Co2p, (c) Al2p and (d) Br3d of NCA-L@BG-NF-3

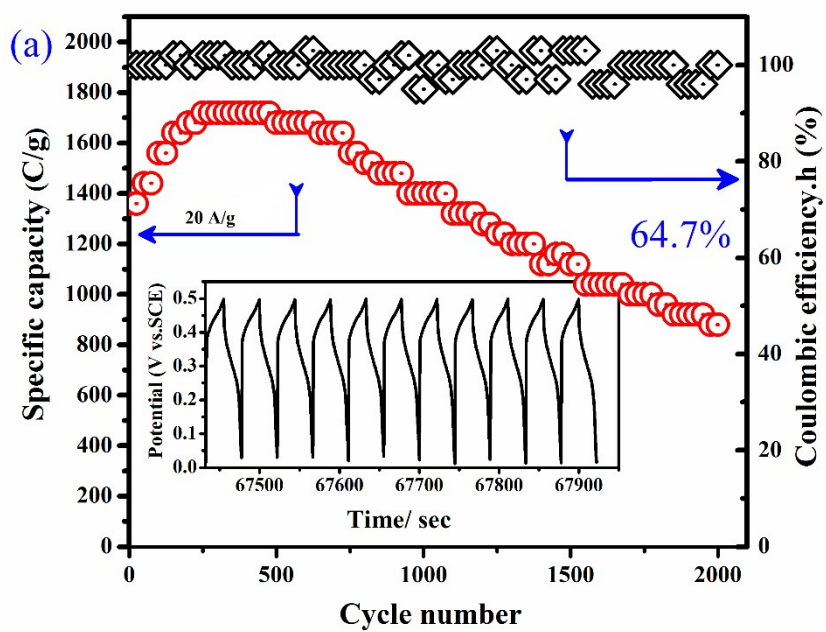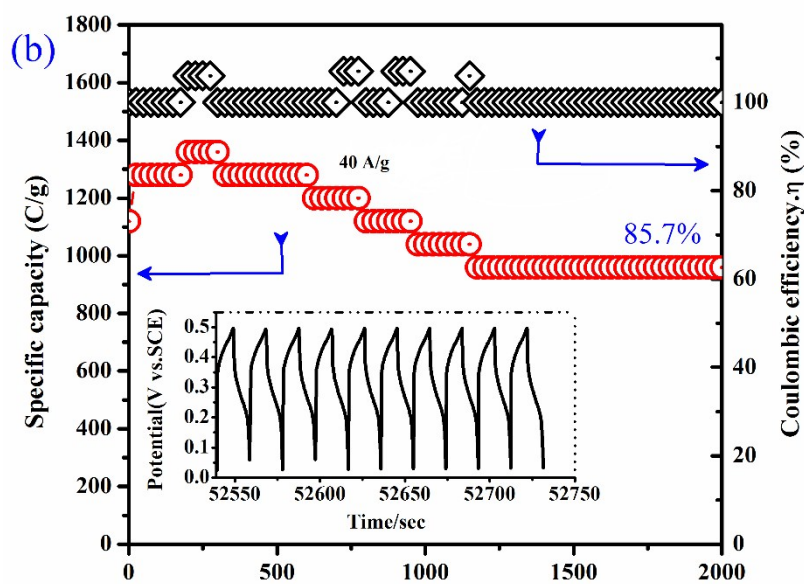

---

## Reference

- 1 X. Yuan, Y. Wang and C. Zhou, One-pot hydrothermal synthesis of graphene/MgAl-LDH composite by urea hydrolysis, *Nanomaterials and Energy*, 2014, **3**, 30–38.
- 2 S. P. Lonkar, J.-M. Raquez and P. Dubois, One-Pot Microwave-Assisted Synthesis of Graphene/Layered Double Hydroxide (LDH) Nanohybrids, *Nano-Micro Letters*, 2015, **7**, 332–340.
- 3 Y. Li, H. Chen, L. Y. Voo, J. Ji, G. Zhang, G. Zhang, F. Zhang and X. Fan, Synthesis of partially hydrogenated graphene and brominated graphene, *Journal of Materials Chemistry*, 2012, **22**, 15021.
- 4 J. Memon, J. Sun, D. Meng, W. Ouyang, M. A. Memon, Y. Huang, S. Yan and J. Geng, Synthesis of graphene/Ni-Al layered double hydroxide nanowires and their application as an electrode material for supercapacitors, *Journal of Materials Chemistry A*, 2014, **2**, 5060–5067.
- 5 O. Jankovský, P. Šimek, K. Klimová, D. Sedmidubský, S. Matějková, M.

---

Pumera and Z. Sofer, Towards graphene bromide: bromination of graphite oxide, *Nanoscale*, 2014, **6**, 6065–6074.
